# Supplementary material for: MD1003 (High-Dose Pharmaceutical-Grade Biotin) for the Treatment of Chronic Visual Loss Related to Optic Neuritis in Multiple Sclerosis: A Randomized, Double-Blind, Placebo-Controlled Study
Source: PubMed Central journal article supplement — CNS Drugs. 2018 May 28;32(7):661–72. doi: 10.1007/s40263-018-0528-2 (PMC6061426; doi:10.1007/s40263-018-0528-2), 2018-05-28
Supplement: 40263_2018_528_MOESM4_ESM.pdf [file 40263_2018_528_MOESM4_ESM.pdf]

**Manuscript title:** MD1003 (high dose Pharmaceutical grade Biotin) for the treatment of chronic visual loss related to optic neuritis in multiple sclerosis: A randomized, double-blind, placebo-controlled study

**Journal:** CNS Drugs

**Authors:** Ayman Tourbah, Olivier Gout, Alain Vighetto, Véronique Deburghgraeve, Jean Pelletier, Caroline Papeix, Christine Lebrun-Frenay, Pierre Labauge, David Brassat, Ahmed Toosy, David-Axel Laplaud, Olivier Outteryck, Thibault Moreau, Marc Debouverie, Pierre Clavelou, Olivier Heinzlef, Jérôme De Sèze, Gilles Defer, Frédéric Sedel, Carl Arndt

**Corresponding author:** Professor Ayman Tourbah, Department of Neurology and Faculty of Medicine, CHU de Reims, and UCRA, Reims, France, LPN EA 2027 Université Paris 8, Saint-Denis. Email: [atourbah@chu-reims.fr](mailto:atourbah@chu-reims.fr)

**Online Resources 4. Secondary and exploratory endpoints in the total cohort (double-blind, placebo-controlled phase)**

| Endpoint                                                                                         | MD1003<br>(n=65) | Placebo<br>(n=28) | P value        |
|--------------------------------------------------------------------------------------------------|------------------|-------------------|----------------|
| Patients with improvement of VA of $\geq 0.3$ logMAR of the selected eye at 100% contrast, n (%) | 6 (9.2)          | 2 (7.1)           | 0.99           |
| Patients with improvement of binocular VA from $< 70$ to $\geq 70/100$ at 100% contrast, n (%)   | 2 (9.5)          | 0 (0.0)           | 0.99           |
| Eyes with reappearance of P100 waves or improvement of P100 latencies $\geq 10$ ms, n (%)        |                  |                   |                |
| Selected eye                                                                                     | 14 (21.5)        | 8 (28.6)          | 0.50           |
| Non-selected eye                                                                                 | 11 (16.9)        | 5 (17.9)          | (for all eyes) |
| Mean (SD) change from baseline in latencies (all eyes)                                           | -2.49 (9.05)     | -0.39 (4.13)      | 0.46           |
| Mean (SD) change from baseline in amplitudes (all eyes)                                          | -0.276 (2.383)   | 0.438 (2.827)     | 0.14           |
| Mean (SD) CGI                                                                                    | 3.77 (0.82)      | 3.92 (0.69)       | 0.53           |
| Mean (SD) SGI                                                                                    | 3.76 (0.88)      | 3.73 (0.67)       | 0.90           |
| Mean (SD) change from baseline in composite NEIVFQ-25                                            | 4.53 (12.66)     | 2.99 (8.85)       | 0.55           |
| Mean (SD) change from baseline in MSQOL-54                                                       |                  |                   |                |
| Physical health composite endpoint                                                               | 0.12 (13.73)     | -0.93 (12.58)     | 0.38           |
| Mental health composite endpoint                                                                 | -1.21 (16.77)    | -7.69 (14.36)     | 0.09           |
| Cognitive function                                                                               | 0.67 (18.75)     | -2.14 (12.35)     | 0.32           |
| Change in health                                                                                 | 5.77 (27.87)     | -5.36 (31.44)     | 0.17           |
| Emotional well-being                                                                             | -1.55 (14.75)    | -5.82 (18.61)     | 0.25           |

|                                                                                                               |                |                |               |
|---------------------------------------------------------------------------------------------------------------|----------------|----------------|---------------|
| Energy                                                                                                        | 0.66 (14.84)   | 0.43 (16.34)   | 0.90          |
| Health distress                                                                                               | 2.69 (20.12)   | -7.14 (17.29)  | <b>0.0153</b> |
| Health perceptions                                                                                            | -0.08 (15.23)  | -3.57 (14.65)  | 0.24          |
| Overall quality of life                                                                                       | -0.72 (14.73)  | -6.93 (10.66)  | <b>0.0538</b> |
| Pain                                                                                                          | -1.38 (18.09)  | -2.38 (20.23)  | 0.70          |
| Physical health                                                                                               | -1.23 (28.07)  | -1.29 (21.21)  | 0.28          |
| Role limitations due to physical problems                                                                     | 0.77 (46.76)   | 6.25 (45.96)   | 0.64          |
| Role limitations due to emotional problems                                                                    | -4.62 (45.98)  | -14.29 (39.99) | 0.40          |
| Satisfaction with sexual function                                                                             | 2.50 (25.08)   | 0.00 (28.87)   | 0.80          |
| Sexual function                                                                                               | 1.61 (22.45)   | -1.49 (23.15)  | 0.65          |
| Social function                                                                                               | -2.31 (17.77)  | -1.19 (19.60)  | 0.55          |
| <b>Exploratory analyses</b>                                                                                   |                |                |               |
| Mean (SD) change from baseline in logMAR at 100% contrast of non-selected eyes, all eyes and binocular vision |                |                |               |
| Non-selected eye                                                                                              | -0.002 (0.113) | -0.012 (0.120) | 0.73          |
| All eyes                                                                                                      | -0.031 (0.168) | -0.024 (0.154) | 0.90          |
| Binocular vision                                                                                              | -0.015 (0.141) | -0.024 (0.150) | 0.80          |
| Mean (SD) change from baseline in logMAR at 5% contrast                                                       |                |                |               |
| Selected eye                                                                                                  | -0.052 (0.182) | -0.086 (0.218) | 0.44          |
| All eyes                                                                                                      | -0.051 (0.170) | -0.078 (0.223) | 0.50          |
| Patients with improvement of VA in at least one eye at 5% contrast of at least: n (%)                         |                |                |               |
| ≥0.3 logMAR                                                                                                   | 6 (9.2)        | 4 (14.3)       | 0.48          |
| ≥0.2 logMAR                                                                                                   | 12 (18.5)      | 7 (25.0)       | 0.58          |
| ≥0.1 logMAR                                                                                                   | 30 (46.2)      | 14 (50.0)      | 0.82          |
| Mean (SD) change from baseline in mean deviation visual field defects                                         |                |                |               |
| Selected eye                                                                                                  | 0.288 (2.916)  | 0.526 (2.824)  | 0.79          |
| All eyes                                                                                                      | 0.049 (2.819)  | 0.272 (2.337)  | 0.53          |
| Mean (SD) change from baseline in RNFL thickness (all eyes)                                                   |                |                |               |
| Mean (SD) change from baseline in temporal RNFL (all eyes)                                                    |                |                |               |
| Mean (SD) change from baseline in macular volume (all eyes)                                                   |                |                |               |

*P* values indicating a significant difference are highlighted in bold. *CGI* clinical global impression scale evaluated by the clinician, *MSQOL-54* Multiple Sclerosis Quality of Life-54, *NEIVFQ-25*, National Eye Institute 25-Item Visual Function Questionnaire, *RNFL* retinal nerve fiber layer, *SD* standard deviation, *SGI* clinical global impression scale evaluated by the subject, *VA* visual acuity.
